# Supplementary material for: Effects of Atmospheric CO2 and Temperature on Wheat and Corn Susceptibility to Fusarium graminearum and Deoxynivalenol Contamination
Source: MDPI journal article supplement (doi:10.3390/plants10122582), 2021-11-25
Supplement: s1 [file s1]

**Supplemental Information:**

TITLE: Effects of atmospheric CO<sub>2</sub> and temperature on wheat and corn susceptibility to *Fusarium graminearum* and deoxynivalenol contamination.

**William T. Hay<sup>1\*</sup>, Susan P. McCormick<sup>1</sup>, Martha M. Vaughan<sup>1</sup>**

<sup>1</sup> USDA, Agricultural Research Service, National Center for Agricultural Utilization Research, Mycotoxin Prevention and Applied Microbiology Research Unit, 1815 N. University, Peoria, IL 61604, USA

\*Corresponding author: William.Hay@usda.gov ; ORCID ID: 0000-0001-8784-6591

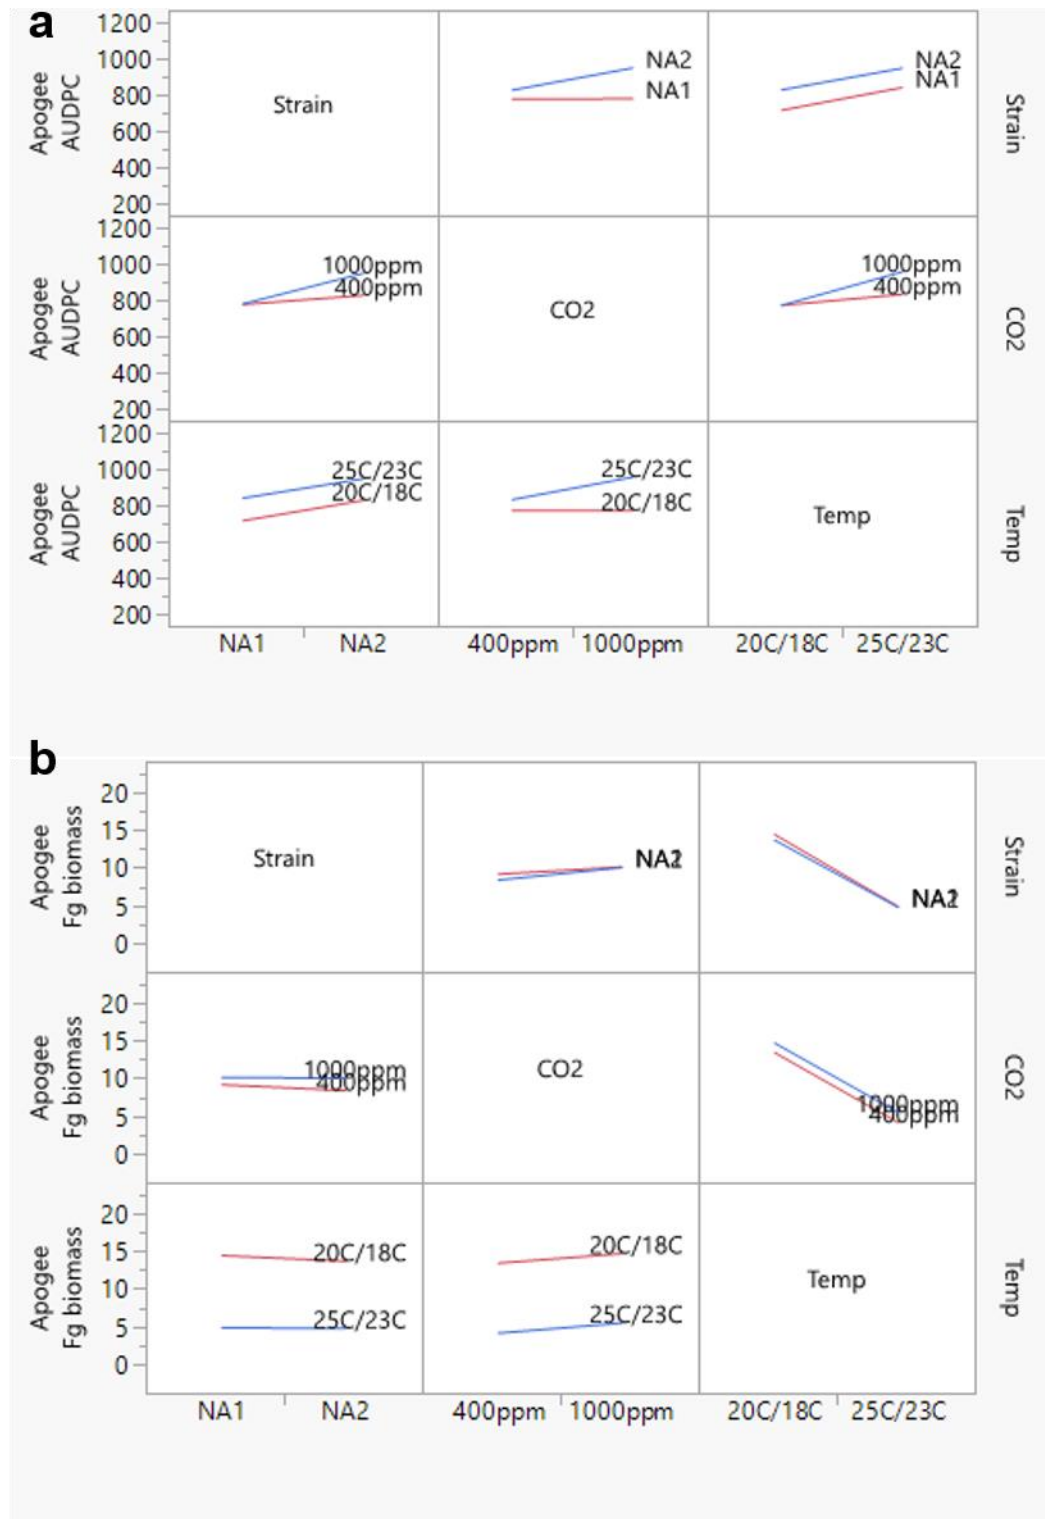

Supplemental Figure S1. Interaction plots generated in JMP demonstrating correlations of variables presented in Figure #2 in the main manuscript.

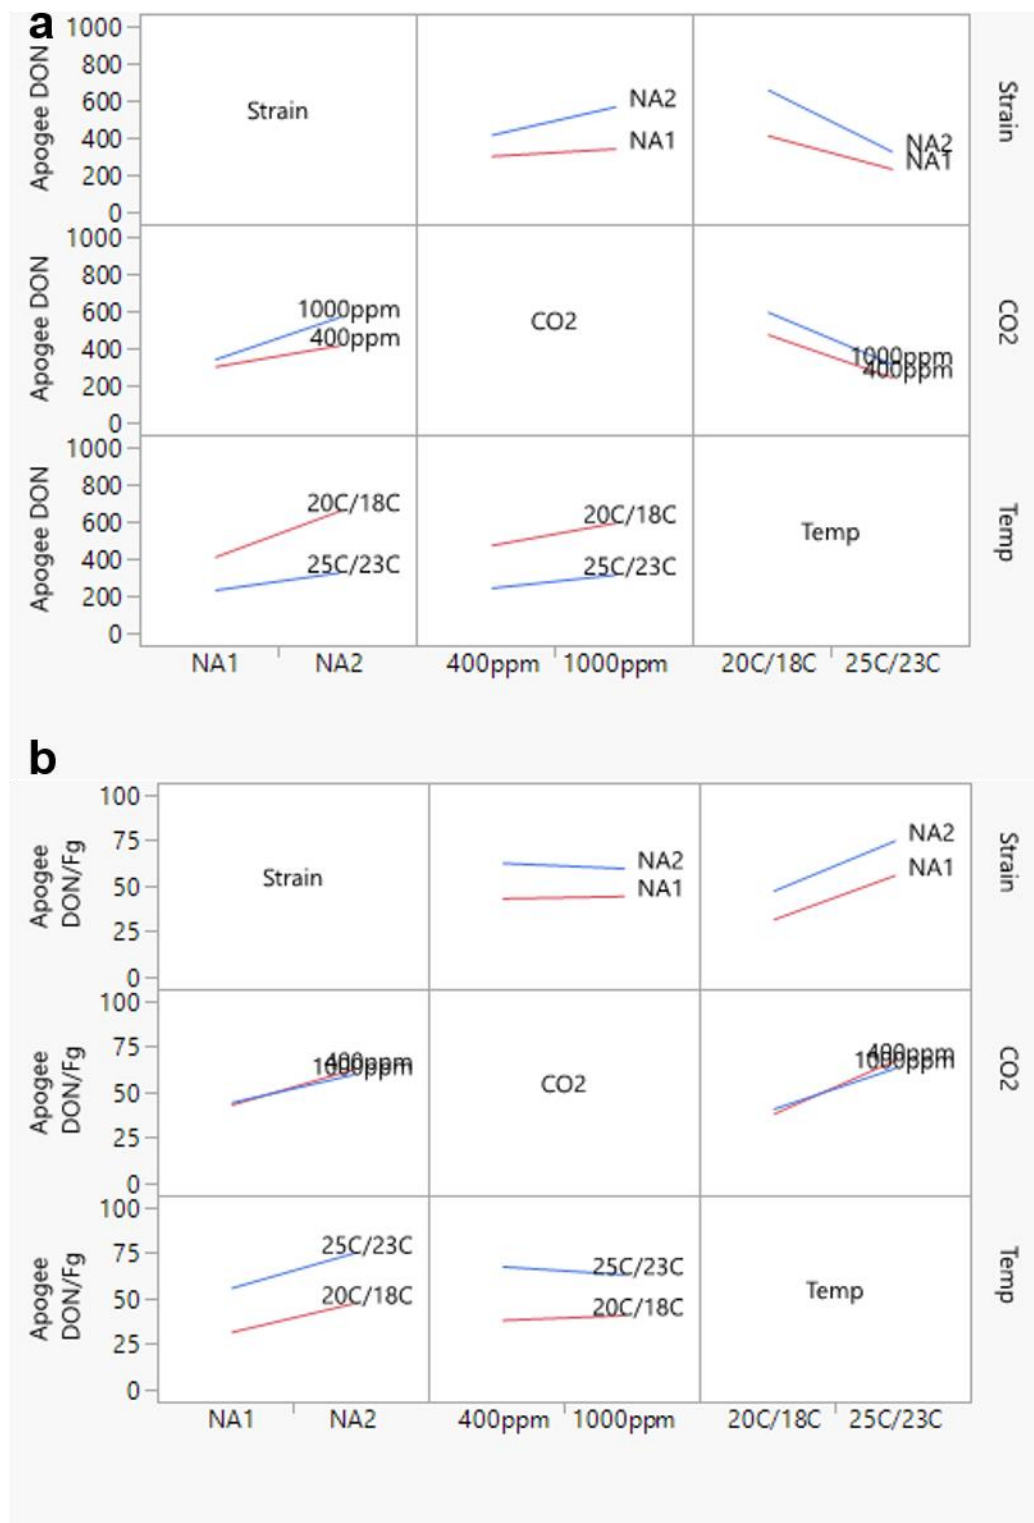

Supplemental Figure S2. Interaction plots generated in JMP demonstrating correlations of variables presented in Figure #3 in the main manuscript.

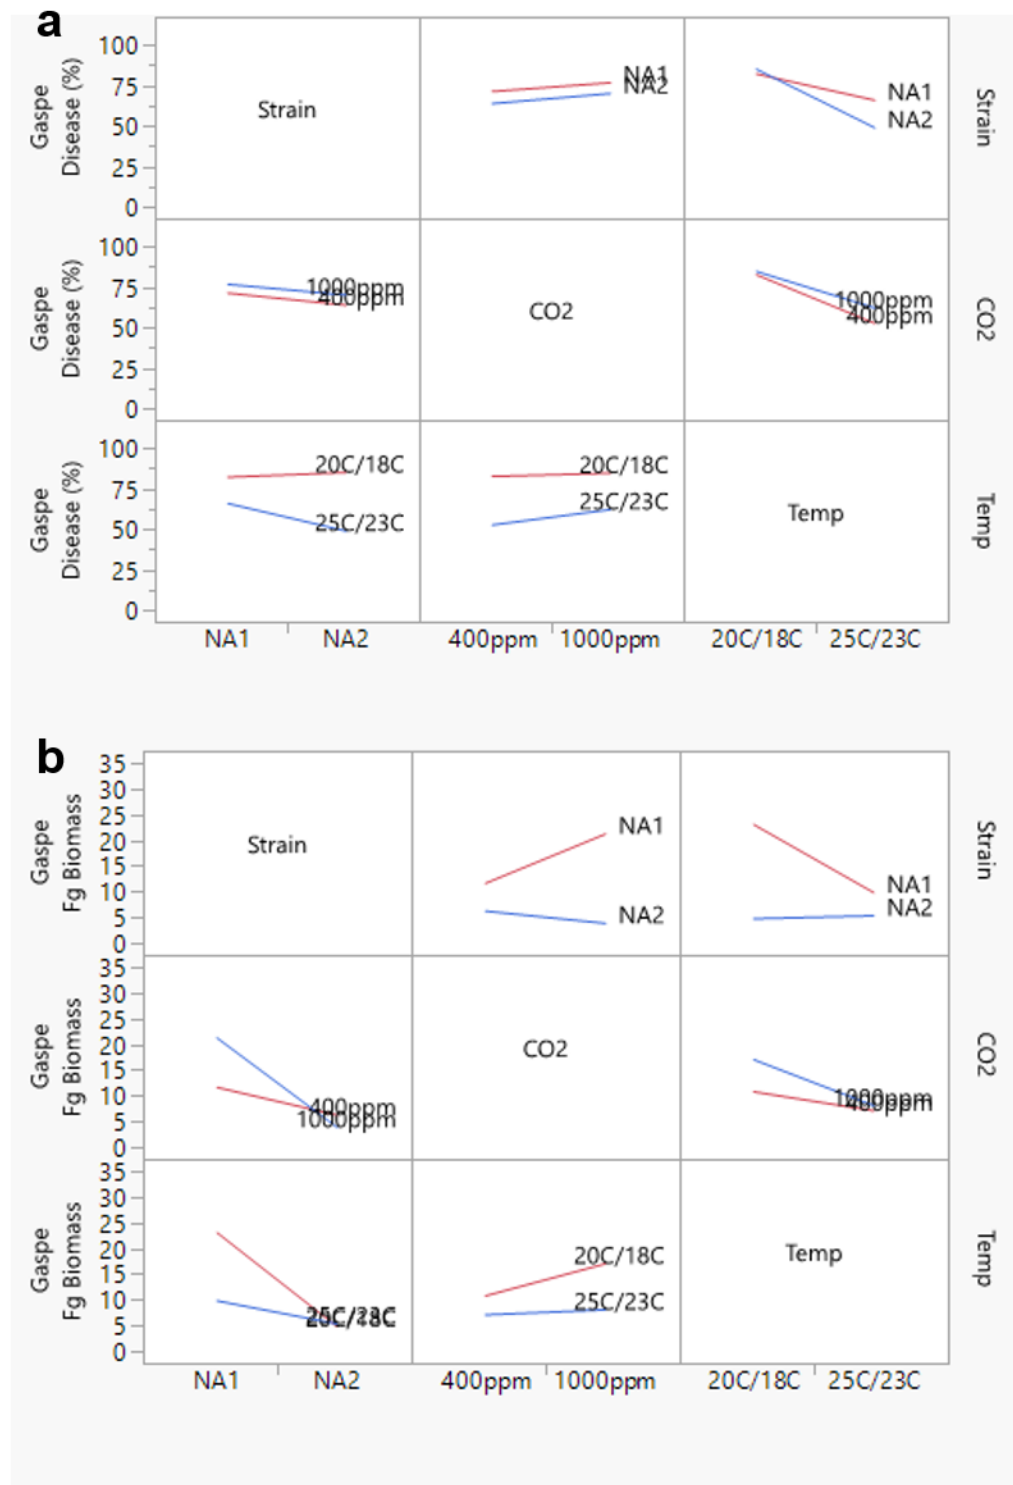

Supplemental Figure S3. Interaction plots generated in JMP demonstrating correlations of variables presented in Figure #4 in the main manuscript.

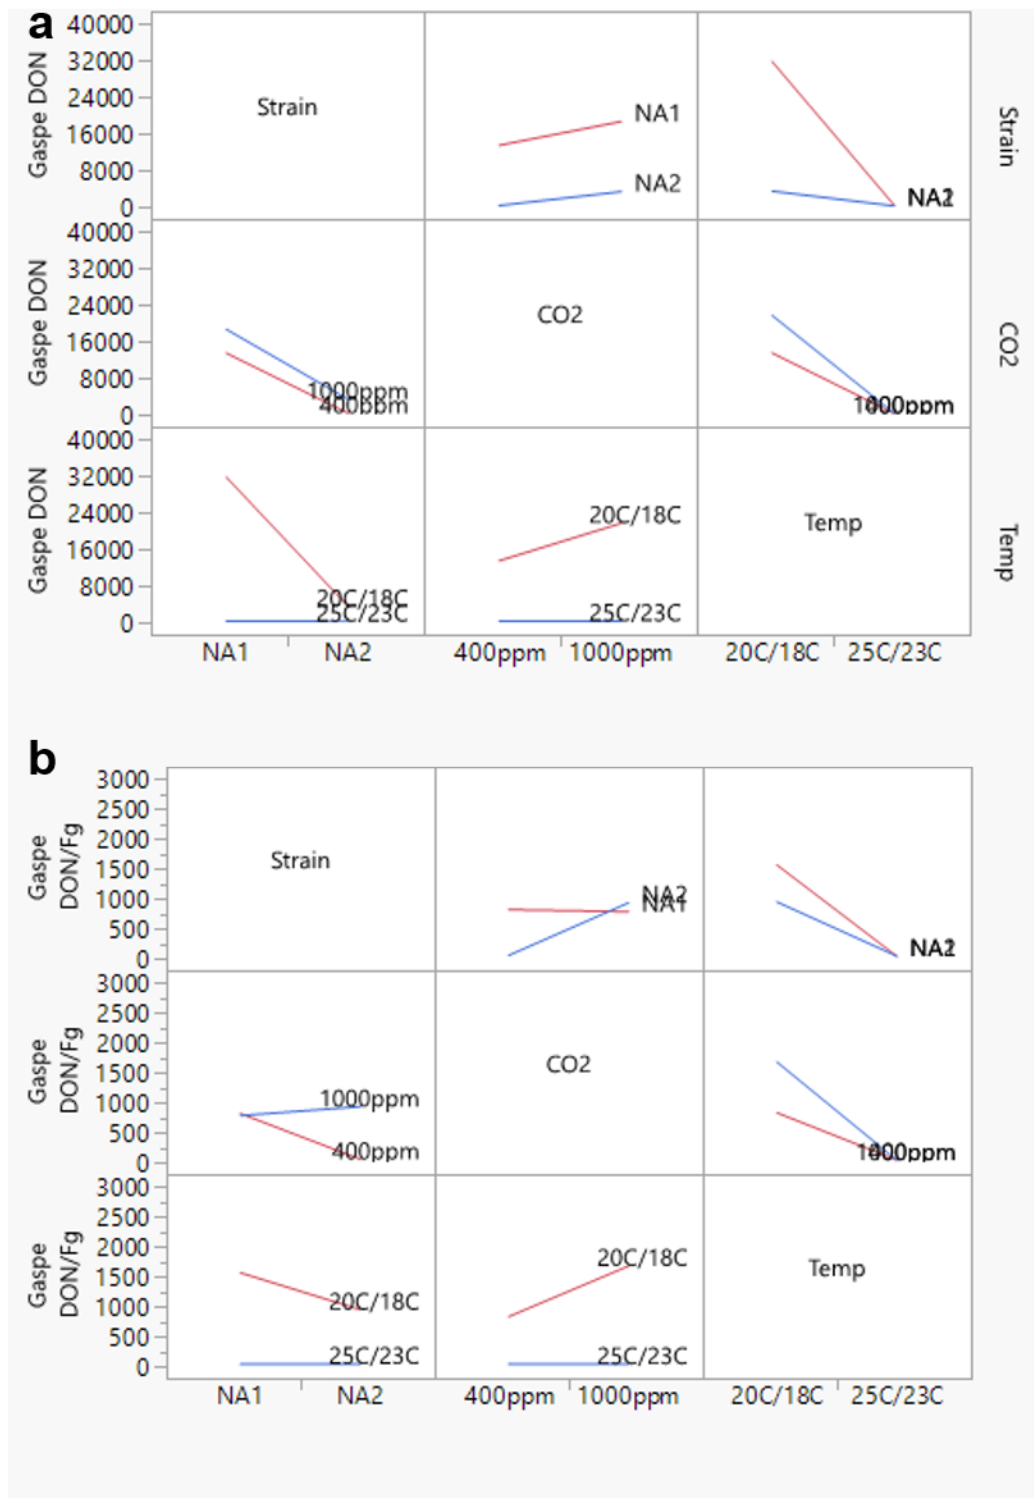

Supplemental Figure S4. Interaction plots generated in JMP demonstrating correlations of variables presented in Figure #5 in the main manuscript.
